# Supplementary material for: Fluorescence nucleobase analogue-based strategy with high signal-to-noise ratio for ultrasensitive detection of food poisoning bacteria
Source: Royal Society of Chemistry journal article supplement (doi:10.1039/d0an01026j), 2020-01-01
Supplement: d0an01026j1.pdf [file d0an01026j1.pdf]

1 *Supplementary data*

---

2 **Fluorescence nucleobase analogue-based strategy with high signal-to-**  
3 **noise ratio for ultrasensitive detection of food poisoning bacteria**

4

5

6 Sung Hyun Hwang<sup>a</sup>, Jung Ho Kim<sup>a</sup>, Junghun Park<sup>b</sup>, and Ki Soo Park<sup>a,\*</sup>

7

8

---

9 <sup>a</sup> *Department of Biological Engineering, College of Engineering, Konkuk University, Seoul*  
10 *05029, Republic of Korea*

11 <sup>b</sup> *Daegyeong Regional Division, Mechatronics Technology Convergence R&D Group,*  
12 *Korea Institute of Industrial Technology (KITECH), Gyeongsangbuk-do 38822, Republic*  
13 *of Korea*

14

15 *\*Corresponding Author*

16 *Prof. Ki Soo Park*

17 *Department of Biological Engineering, College of Engineering, Konkuk University*

18 *Seoul 05029, Republic of Korea*

19 *Tel: +82-2-450-3742; Fax: +82-2-450-3742*

20 *E-mail: akdong486@konkuk.ac.kr or kskonkuk@gmail.com*

22 **Table S1.** Oligonucleotide sequences used in this study.

23

| Name                                                                                | Sequence (5' -> 3')                                              |
|-------------------------------------------------------------------------------------|------------------------------------------------------------------|
| S1 <sup>(a)</sup>                                                                   | AAG CTG CAA TCC GGG 2APGG GTG GG                                 |
| S2 <sup>(a)</sup>                                                                   | TGG GCT TTT AAG ATA ACC                                          |
| a (blocker-14mer)                                                                   | CCG GAT TGC AGC TT                                               |
| b (blocker-15mer)                                                                   | CCC GGA TTG CAG CTT                                              |
| c (blocker-16mer)                                                                   | TCC CGG ATT GCA GCT T                                            |
| d (blocker-17mer)                                                                   | CTC CCG GAT TGC AGC TT                                           |
| e (blocker-18mer)                                                                   | CCT CCC GGA TTG CAG CTT                                          |
| f (blocker-19mer)                                                                   | CCC TCC CGG ATT GCA GCT T                                        |
| g (blocker-20mer)                                                                   | ACC CTC CCG GAT TGC AGC TT                                       |
| h (blocker-21mer)                                                                   | CAC CCT CCC GGA TTG CAG CTT                                      |
| i (blocker-22mer)                                                                   | CCA CCC TCC CGG ATT GCA GCT T                                    |
| j (blocker-23mer)                                                                   | CCC ACC CTC CCG GAT TGC AGC TT                                   |
| e-1 (blocker-16mer)                                                                 | CCT CCC GGA TTG CAG C                                            |
| e-2 (blocker-14mer)                                                                 | CCT CCC GGA TTG CA                                               |
| e-3 (blocker-12mer)                                                                 | CCT CCC GGA TTG                                                  |
| e-4 (blocker-10mer)                                                                 | CCT CCC GGA T                                                    |
| e-4-phos (blocker-10mer)                                                            | CCT CCC GGA T-phosphate                                          |
| e-5 (blocker-8mer)                                                                  | CCT CCC GG                                                       |
| CT (26mer)                                                                          | GGT TAT CTT AAA AGG GAT TGC AGC TT                               |
| SA (26mer)                                                                          | TCA GAC TAT TAT TGG TTG ATA CAC CT                               |
| NG (26mer)                                                                          | CTG CCG CCG ATA TAC CTA GCA AGC TC                               |
| KP (26mer)                                                                          | GCC GCC ATT ACC ATG AGC GAT AAC AG                               |
| MG (26mer)                                                                          | CTC AAG TAT CTC AAT GCT GTT GAG AA                               |
| Helper-linked forward primer<br>( <i>UidA</i> gene; <i>E. coli</i> ) <sup>(b)</sup> | GGT TAT CTT AAA AGG GAT TGC AGC TTG CGA<br>GGT ACG GTA GGA GTT G |
| Helper-linked reverse primer<br>( <i>UidA</i> gene; <i>E. coli</i> ) <sup>(b)</sup> | GGT TAT CTT AAA AGG GAT TGC AGC TTG AAG<br>GGC GAA CAG TTC CTG A |

24

25 <sup>(a)</sup> Blue and orange indicate the split segment of the G-quadruplex of S1 and S2, respectively.

26 <sup>(b)</sup> Red and green indicate the *Chlamydia trachomatis* (CT) target sequence and *E. coli*-specific  
27 sequence, respectively.

28

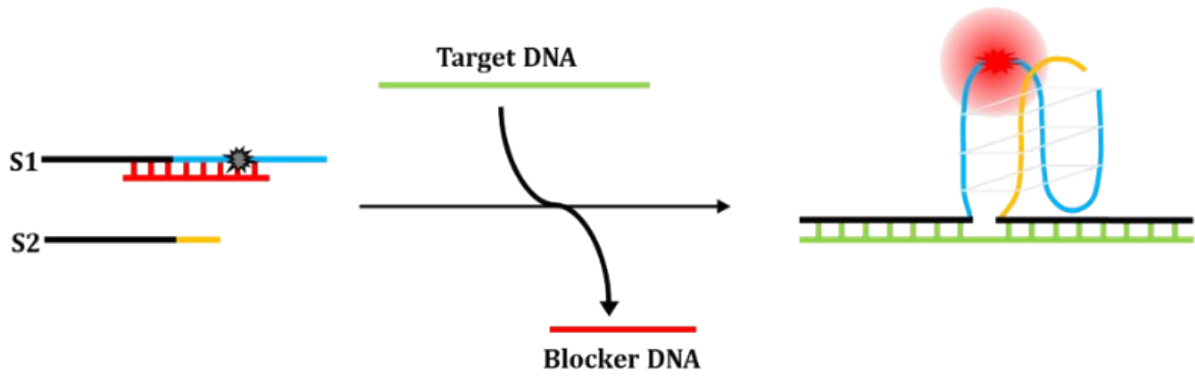

29 **Scheme S1.** Schematic illustration (not drawn to scale) of the fluorescence-based target  
 30 DNA detection strategy using a 2-AP-containing split G-quadruplex in combination with the  
 31 blocker DNA. The S1 and S2 probes contain two split G-rich segments (sky blue and orange,  
 32 respectively), which are divided at a 3:1 split ratio based on the number of guanine bases, in  
 33 addition to a target-specific overhang sequence (black). The S1 probe only contains 2-AP.

---

35 **Table S2.** Comparison of our method with other fluorescence methods for target DNA  
36 detection.

37

| Key detection component/principle                             | Dynamic range | Detection limit | Assay time | Reference |
|---------------------------------------------------------------|---------------|-----------------|------------|-----------|
| Graphene oxide and SYBR Green I dye                           | 0–50 nM       | 0.5 nM          | 70 min     | 1         |
| DNA oligonucleotide-stabilized silver nanoclusters            | 25–1000 nM    | 14 nM           | 50 min     | 2         |
| ssDNA-adsorbed graphene oxide                                 | 0–50 nM       | 1 nM            | 35 min     | 3         |
| Bioluminescence resonance energy transfer                     | 20–130 nM     | 20 nM           | 30 min     | 4         |
| 2-AP-containing split G-quadruplex                            | 10–2000 nM    | 7.24 nM         | 45 min     | 5         |
| 2-AP-containing split G-quadruplex in addition to blocker DNA | 1–2000 nM     | 0.17 nM         | 45 min     | This work |

38

39

40

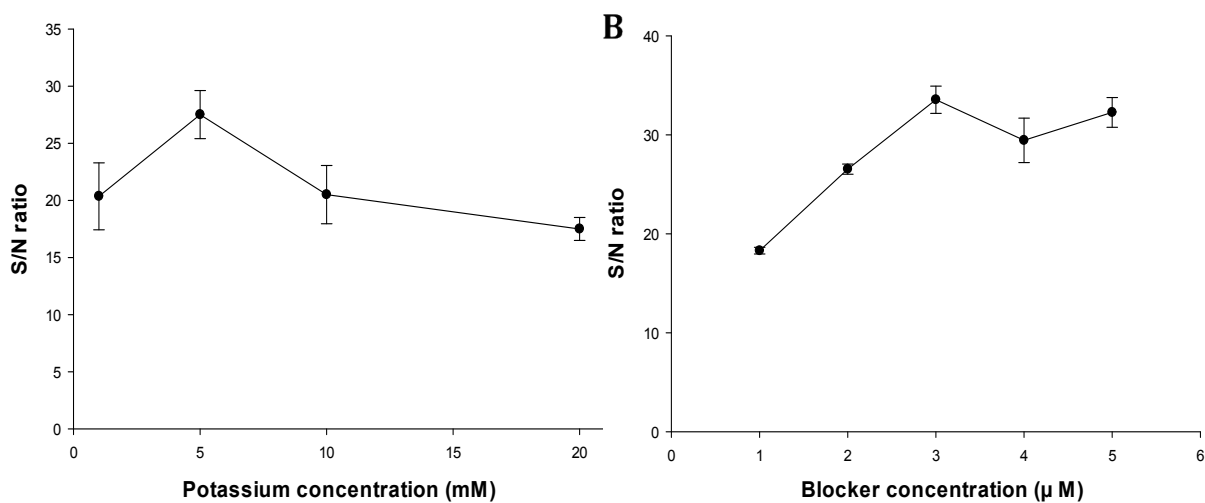

41

42

43 **Figure S1.** Optimization of experimental conditions for successful operation of the  
 44 developed system. Concentrations of (A) potassium ions and (B) blocker DNA. The S/N ratio  
 45 was calculated as  $(F - F_0)/F_0$ , where  $F_0$  and  $F$  are fluorescence signals in the absence and  
 46 presence of target DNA, respectively. The final concentration of S1, S2, and target DNA was  
 47 2 μM. The error bars show the standard deviation among three replicates.

---

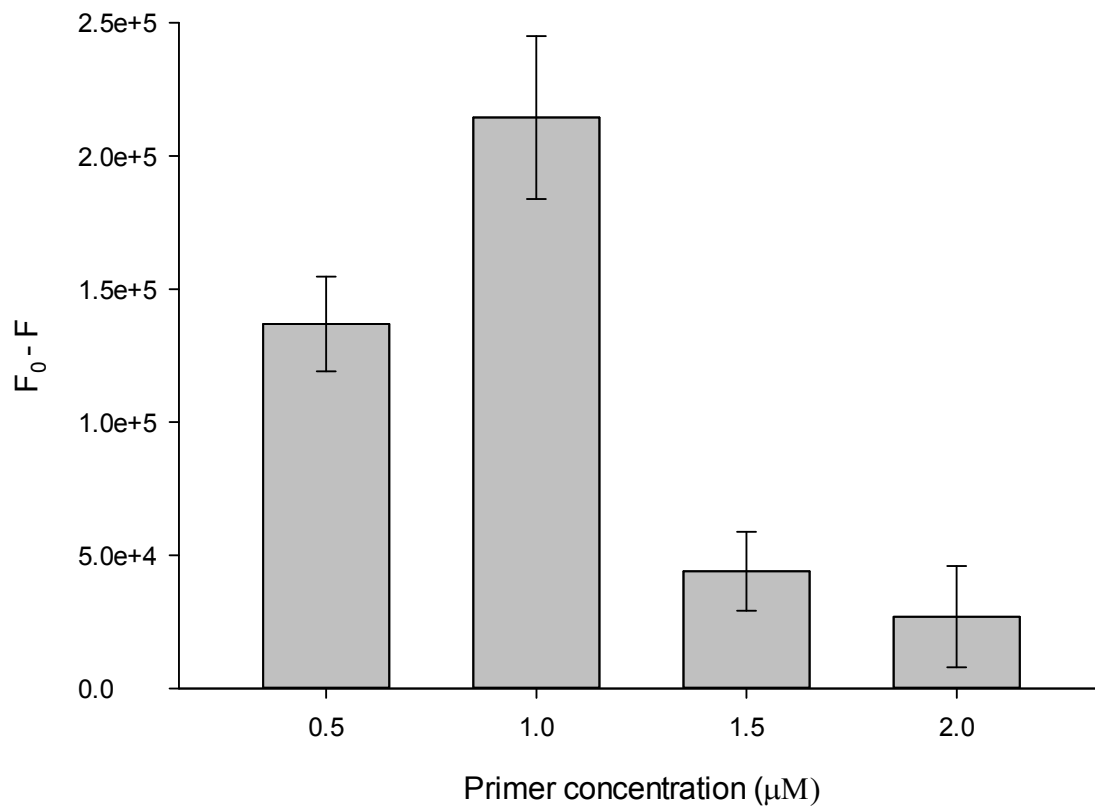

49

50 **Figure S2.** Optimization of primer concentration.  $F_0$  and  $F$  are fluorescence signals in the  
51 absence and presence of *E. coli* gDNA, respectively. The copy number of *E. coli* gDNA is  $10^4$ .  
52 The error bars show the standard deviation among three replicates.

---

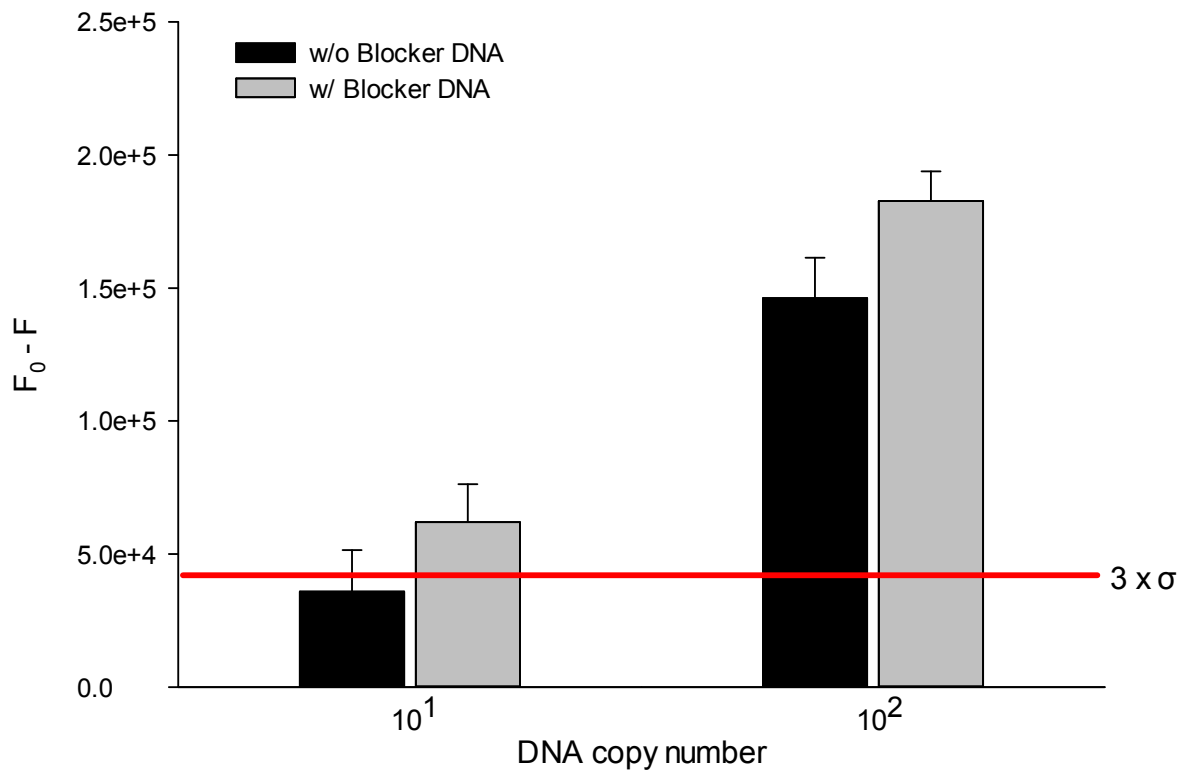

54  
55

56 **Figure S3.** Detection of *E. coli* gDNA (10 and 100 copies) with two strategies: one is without  
 57 (w/o) Blocker DNA originally used in our previous work, while the other is with (w/) blocker  
 58 DNA proposed in this work.  $F_0$  and  $F$  are fluorescence signals in the absence and presence of  
 59 *E. coli* gDNA, respectively. The horizontal red line represents the threshold line defined by 3  
 60  $\times \sigma$  where  $\sigma$  is the standard deviation.

61

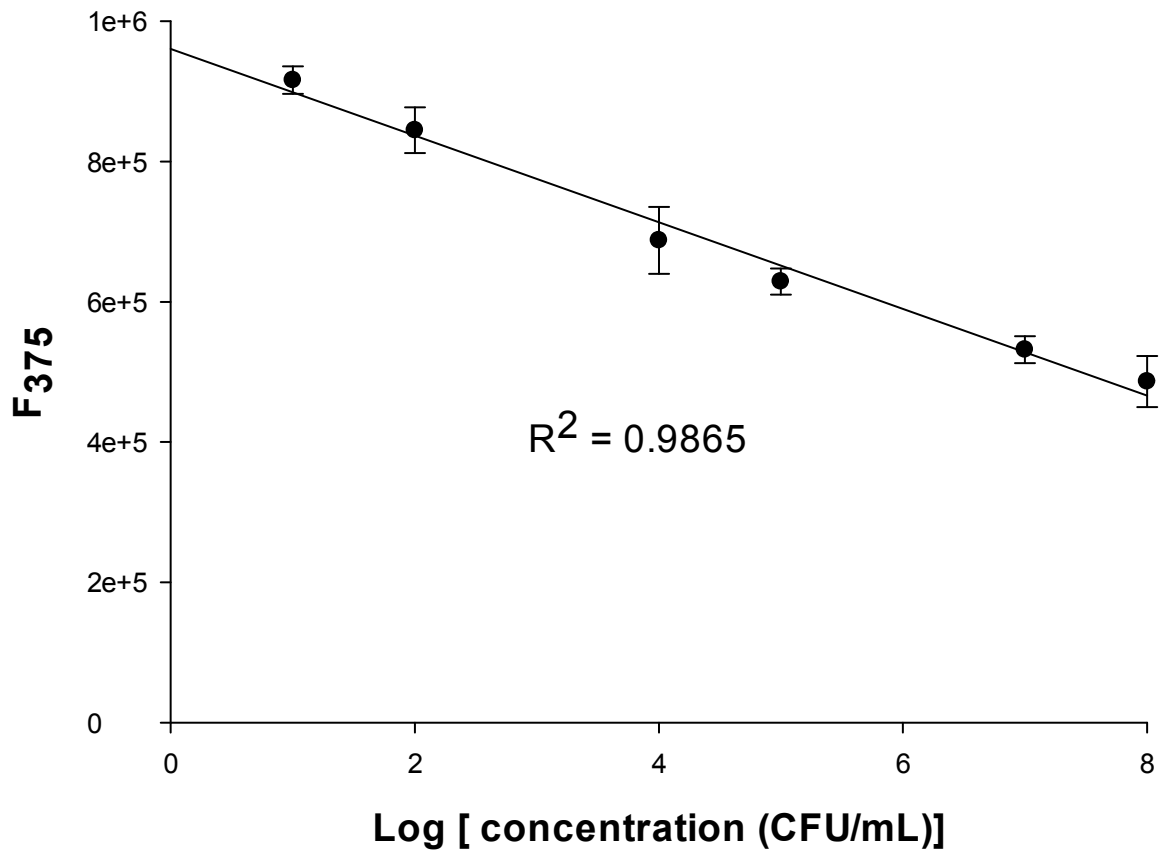

63  
64  
65

66 **Figure S4.** Linear relationship between the fluorescent intensity at 375 nm ( $F_{375}$ ) and  
67 concentration of *E. coli* (colony forming units, CFU) spiked in the lettuce sample. The final  
68 concentration of S1 and S2 was 2  $\mu$ M, and that of the blocker DNA was 3  $\mu$ M. The error bars  
69 show the standard deviation among three replicates.

70



## 71 **References**

---

- 72 1. H. Qiu, N. Wu, Y. Zheng, M. Chen, S. Weng, Y. Chen, and X. Lin, *Int. J. Nanomedicine*, 2015,  
73 **10**, 147.
- 74 2. G. Y. Lan, W. Y. Chen, and H. T. Chang, *Biosens. Bioelectron.*, 2011, **26**(5), 2431-2435.
- 75 3. M. Zhang, B. C. Yin, W. Tan, and B. C. Ye, *Biosens. Bioelectron.*, 2011, **26**(7), 3260-3265.
- 76 4. K. A. Cissell, S. Campbell, and S. K. Deo, *Anal. Bioanal. Chem.*, 2008, **391**(7), 2577.
- 77 5. S. H. Hwang, W. Y. Kwon, H. Eun, S. Jeong, J. S. Park, K. J. Kim, K. S. Park, *Artif. Cell.*  
78 *Nanomed. B.*, 2018, **46**(sup3), S950-S955.
-
